# Supplementary material for: Rational design and synthesis of highly oriented copper–zinc ferrite QDs/titania NAE nano-heterojunction composites with novel photoelectrochemical and photoelectrocatalytic behaviors
Source: Royal Society of Chemistry journal article supplement (doi:10.1039/c8dt02263a), 2018-01-01
Supplement: c8dt02263a1.pdf [file c8dt02263a1.pdf]

## Electronic Supplementary Information

### Rational Design and Synthesis of Highly Oriented Copper-Zinc Ferrite QDs/Titania NAEs Nano-Heterojunctioned Composites with Novel Photoelectrochemical and Photoelectrocatalytic Behavior

Shiying Fan<sup>a</sup>, Xinyong Li, <sup>\*a,b</sup>, Qidong Zhao <sup>a</sup>, Libin Zeng<sup>a</sup>, Mingmei Zhang <sup>a</sup>, Zhifan Yin <sup>a</sup>, Tingting Lian <sup>a</sup>, Moses O. Tadé <sup>b</sup>, Shaomin Liu <sup>b</sup>

<sup>a</sup>State Key Laboratory of Fine Chemicals, Key Laboratory of Industrial Ecology and Environmental Engineering (MOE), School of Environmental Science and Technology, Dalian University of Technology, Dalian 116024, China;

<sup>b</sup>Department of Chemical Engineering, Curtin University, Perth, WA 6845, Australia.

The supporting information contains a total of 12 figures.

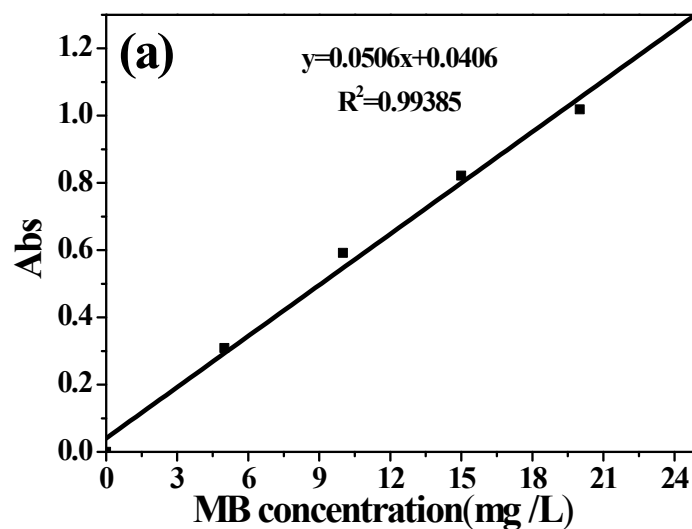

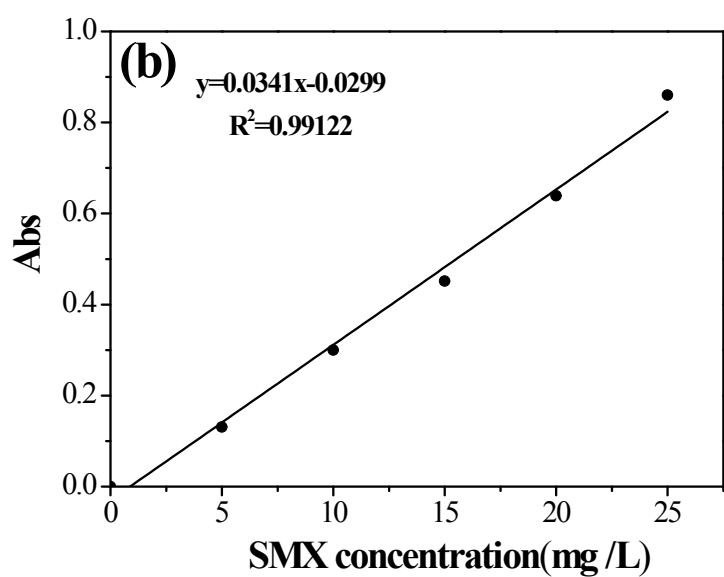

Fig.S1 Standard curve of Methylene Blue (a) and Sulfamethoxazole (b)

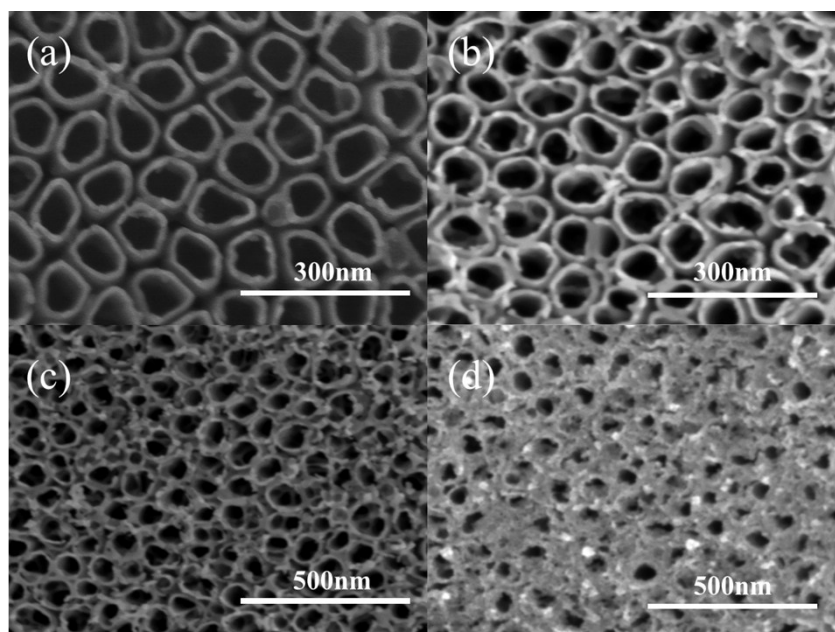

Fig. S2 SEM images of the  $\text{Cu}_{0.5}\text{Zn}_{0.5}\text{Fe}_2\text{O}_4$  QDs/ $\text{TiO}_2$  composite NAEs prepared by different concentration of precursor. (a) 0 M (b) 0.06M (c) 0.1M (d) 0.14M. (Experimental parameters: impregnation time = 10 min, vacuum pressure= $1 \times 10^{-3}$  Pa, cycles = 10 repetitions, pH=9)

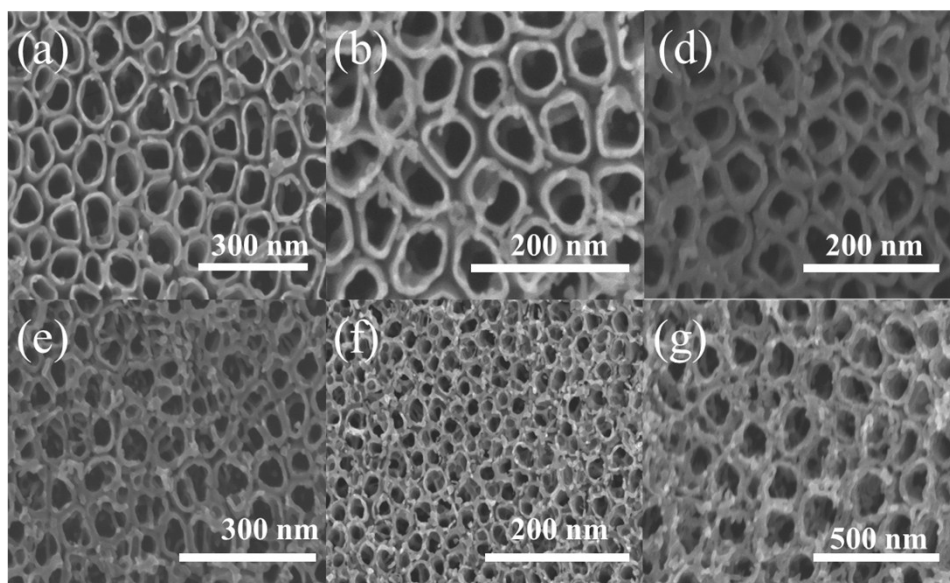

Fig. S3 SEM images of the  $\text{Cu}_{0.5}\text{Zn}_{0.5}\text{Fe}_2\text{O}_4$  QDs/ $\text{TiO}_2$  NAEs nanocomposites prepared by different pH of precursor. (a) pH=0 (b) pH=3 (c) pH=5 (d) pH=7 (e) pH=9 (f) pH=11. (Experimental parameters: impregnation time = 10 min, vacuum pressure=  $1 \times 10^{-3}$  Pa, concentration = 0.05 M  $\text{Cu}(\text{NO}_3)_2 \cdot 6\text{H}_2\text{O}$ , 0.05 M  $\text{Zn}(\text{NO}_3)_2 \cdot 6\text{H}_2\text{O}$  and 0.2 M  $\text{Fe}(\text{NO}_3)_3 \cdot 9\text{H}_2\text{O}$ , cycles = 5 repetitions)

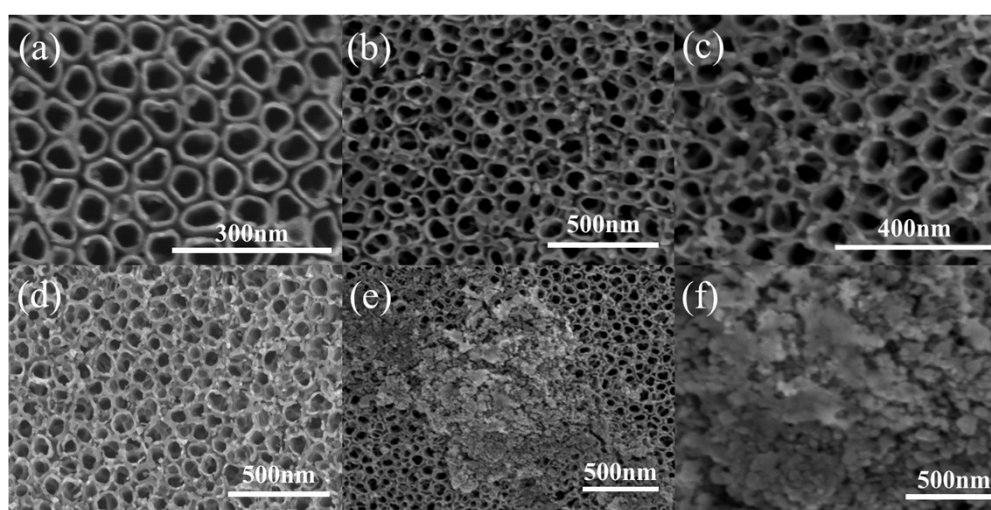

Fig. S4 SEM images of the  $\text{Cu}_{0.5}\text{Zn}_{0.5}\text{Fe}_2\text{O}_4$  QDs/ $\text{TiO}_2$  NAEs nanocomposites prepared by different deposition cycles. (a) 0 repetitions, (b) 1 repetitions, (c) 3 repetitions, (d) 5 repetitions, (d) 7 repetitions, (d) 9 repetitions. (Experimental parameters: impregnation time = 10 min, vacuum pressure=  $1 \times 10^{-3}$  Pa, concentration = 0.05 M  $\text{Cu}(\text{NO}_3)_2 \cdot 6\text{H}_2\text{O}$ , 0.05 M  $\text{Zn}(\text{NO}_3)_2 \cdot 6\text{H}_2\text{O}$  and 0.2 M  $\text{Fe}(\text{NO}_3)_3 \cdot 9\text{H}_2\text{O}$ , pH = 9)

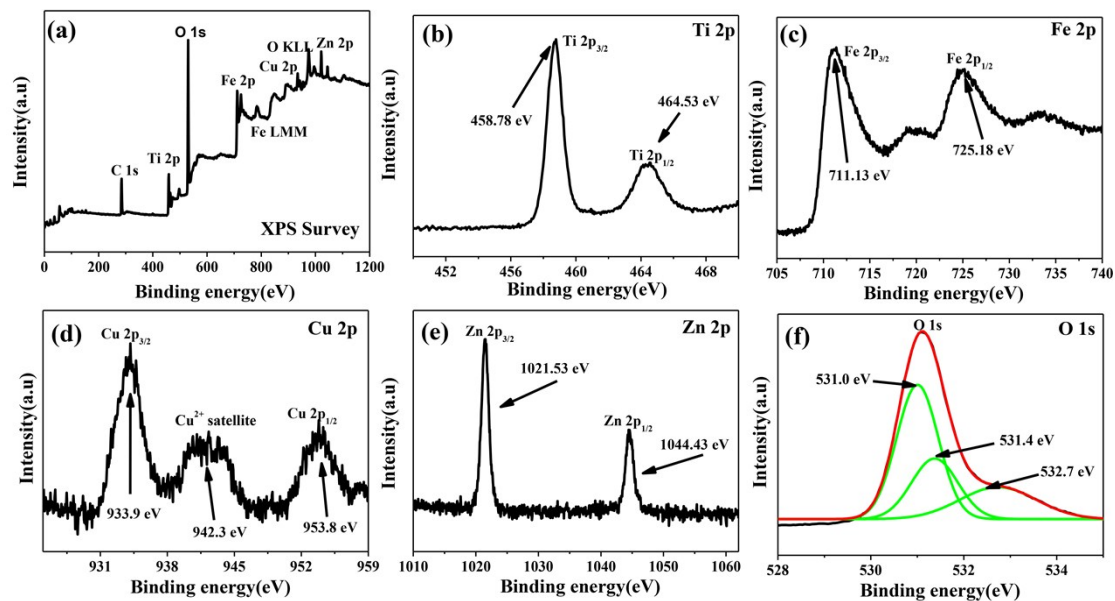

Fig. S5 XPS survey spectrum (a) and high-resolution XPS spectra of Ti 2p (b), Fe 2P (c), Cu 2p (d), Zn 2p (E) and O 1s (f) for  $\text{Cu}_{0.5}\text{Zn}_{0.5}\text{Fe}_2\text{O}_4$  QDs/ $\text{TiO}_2$ -NAEs nanocomposites

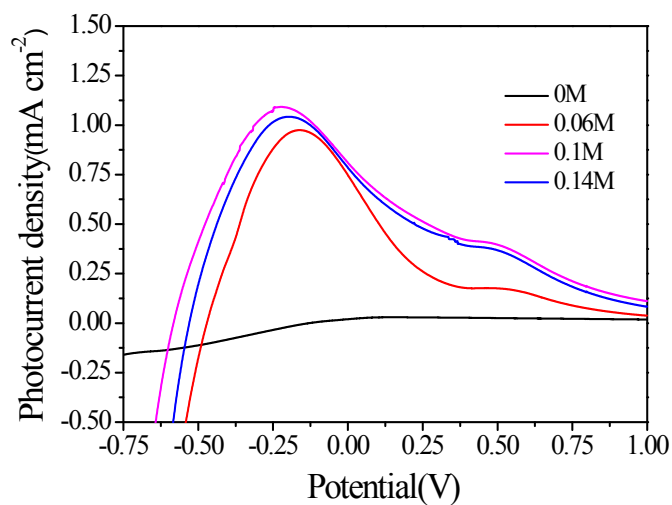

Fig. S6 Photocurrent density vs. applied potential (vs. SCE) of  $\text{Cu}_{0.5}\text{Zn}_{0.5}\text{Fe}_2\text{O}_4$  QDs/ $\text{TiO}_2$ -NAEs nanocomposites under visible light irradiation with different concentration of precursor. (black: 0 M, red: 0.06M, pink: 0.1M, blue: 0.14M).

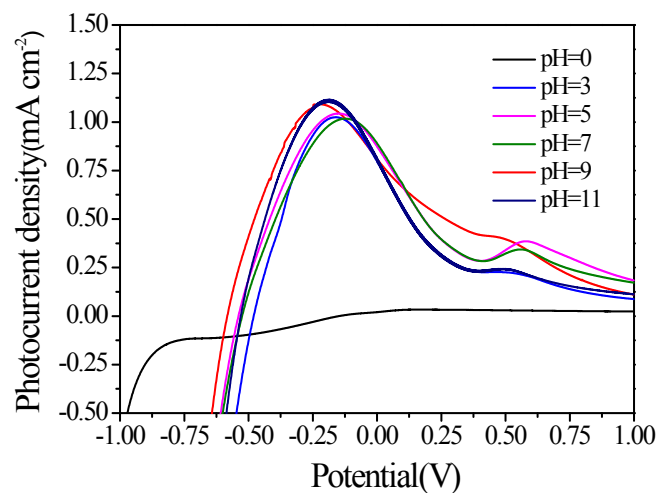

Fig. S7 Photocurrent density vs. applied potential (vs. SCE) of  $\text{Cu}_{0.5}\text{Zn}_{0.5}\text{Fe}_2\text{O}_4$  QDs/ $\text{TiO}_2$ -NAEs under visible light irradiation with different pH values. (black: pH=0, blue: pH=3, pink: pH=5, green: pH=7, red: pH=9, dark blue: pH=11).

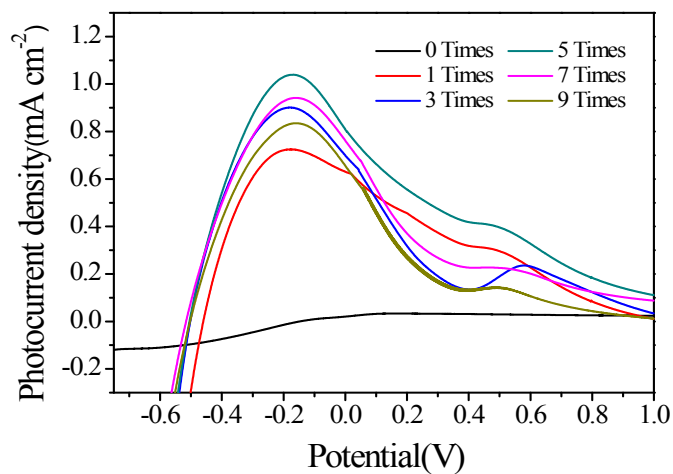

Fig. S8 Photocurrent density vs. applied potential (vs. SCE) of  $\text{Cu}_{0.5}\text{Zn}_{0.5}\text{Fe}_2\text{O}_4$  QDs/ $\text{TiO}_2$ -NAEs nanocomposites under visible light irradiation with different deposition cycles. (black: 0 times, red: 1 times, blue: 3 times, green: 5 times, pink: 7 times, brown: 9 times)

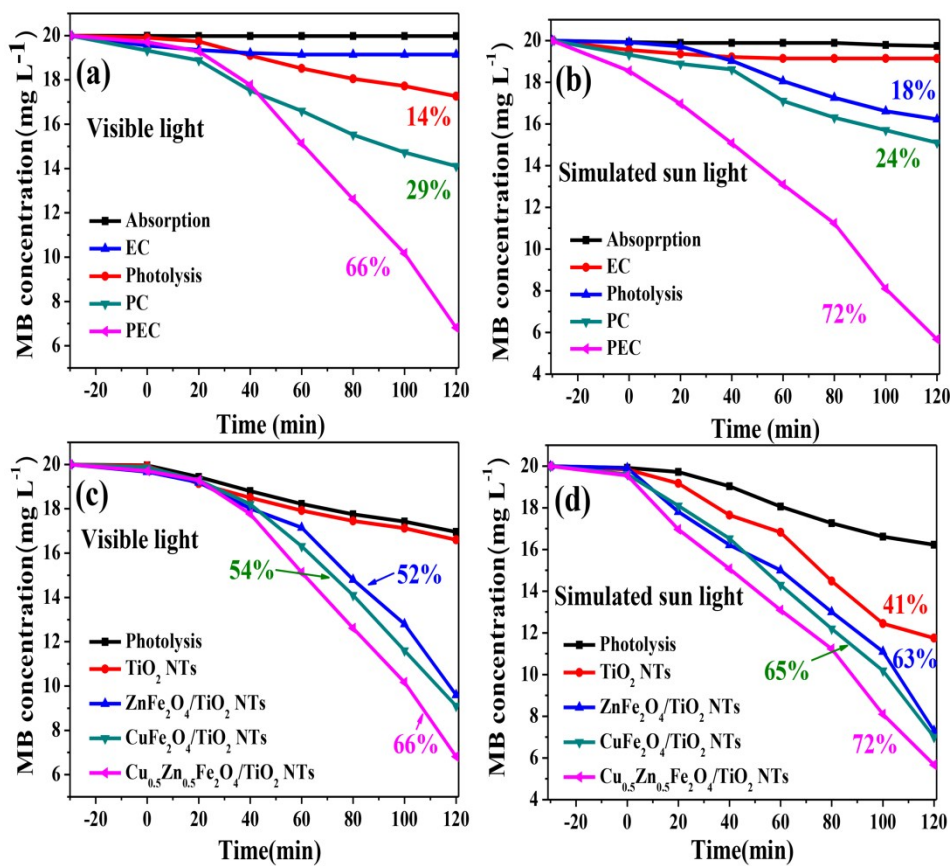

Fig. S9 The concentration vs. time plotted for photoelectrocatalytic degradation of MB by TiO<sub>2</sub> NAEs and Cu<sub>0.5</sub>Zn<sub>0.5</sub>Fe<sub>2</sub>O<sub>4</sub> QDs/TiO<sub>2</sub> NAEs in different processes under visible light irradiation: (a), (c) ( $I_0 = 30 \text{ mW cm}^{-2}$ ,  $0.6 \text{ V vs. SCE}$ ,  $C_0 = 20 \text{ mg L}^{-1}$ ) and simulated sunlight irradiation (b), (d) ( $I_0 = 33 \text{ mW cm}^{-2}$ ,  $0.6 \text{ V vs. SCE}$ ,  $C_0 = 20 \text{ mg L}^{-1}$ ).

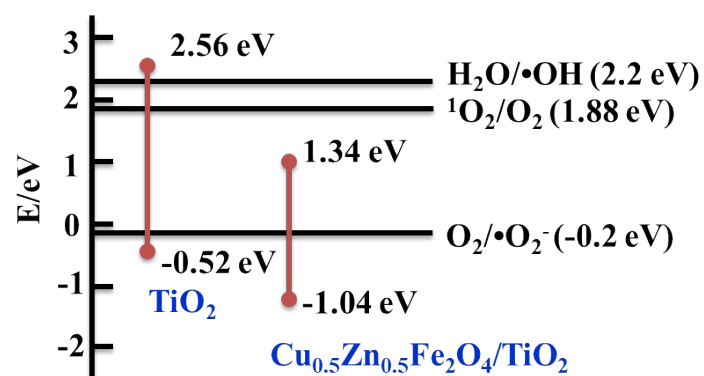

Fig. S10 Band structures of  $\text{TiO}_2$  and  $\text{Cu}_{0.5}\text{Zn}_{0.5}\text{Fe}_2\text{O}_4/\text{TiO}_2$ , and the redox potential of each ROS

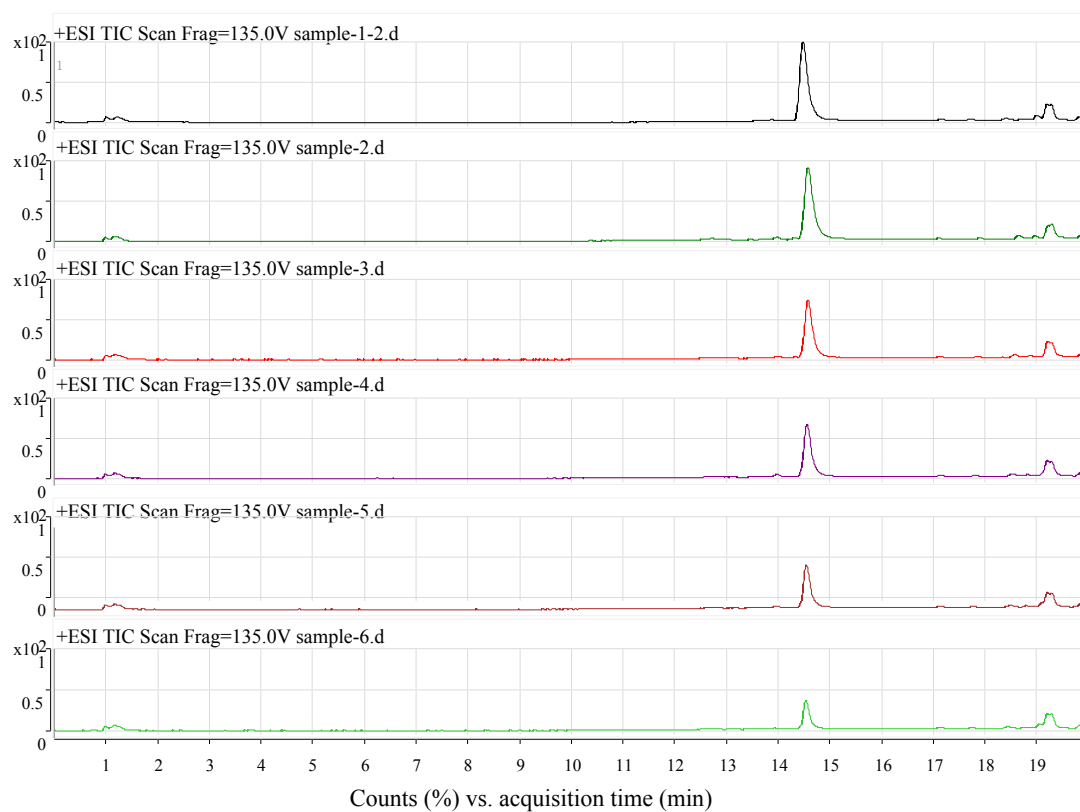

Fig. S11 HPLC graphs of the MB solution at different reaction times. Conditions: MB,  $20 \text{ mg L}^{-1}$  (initial concentration).

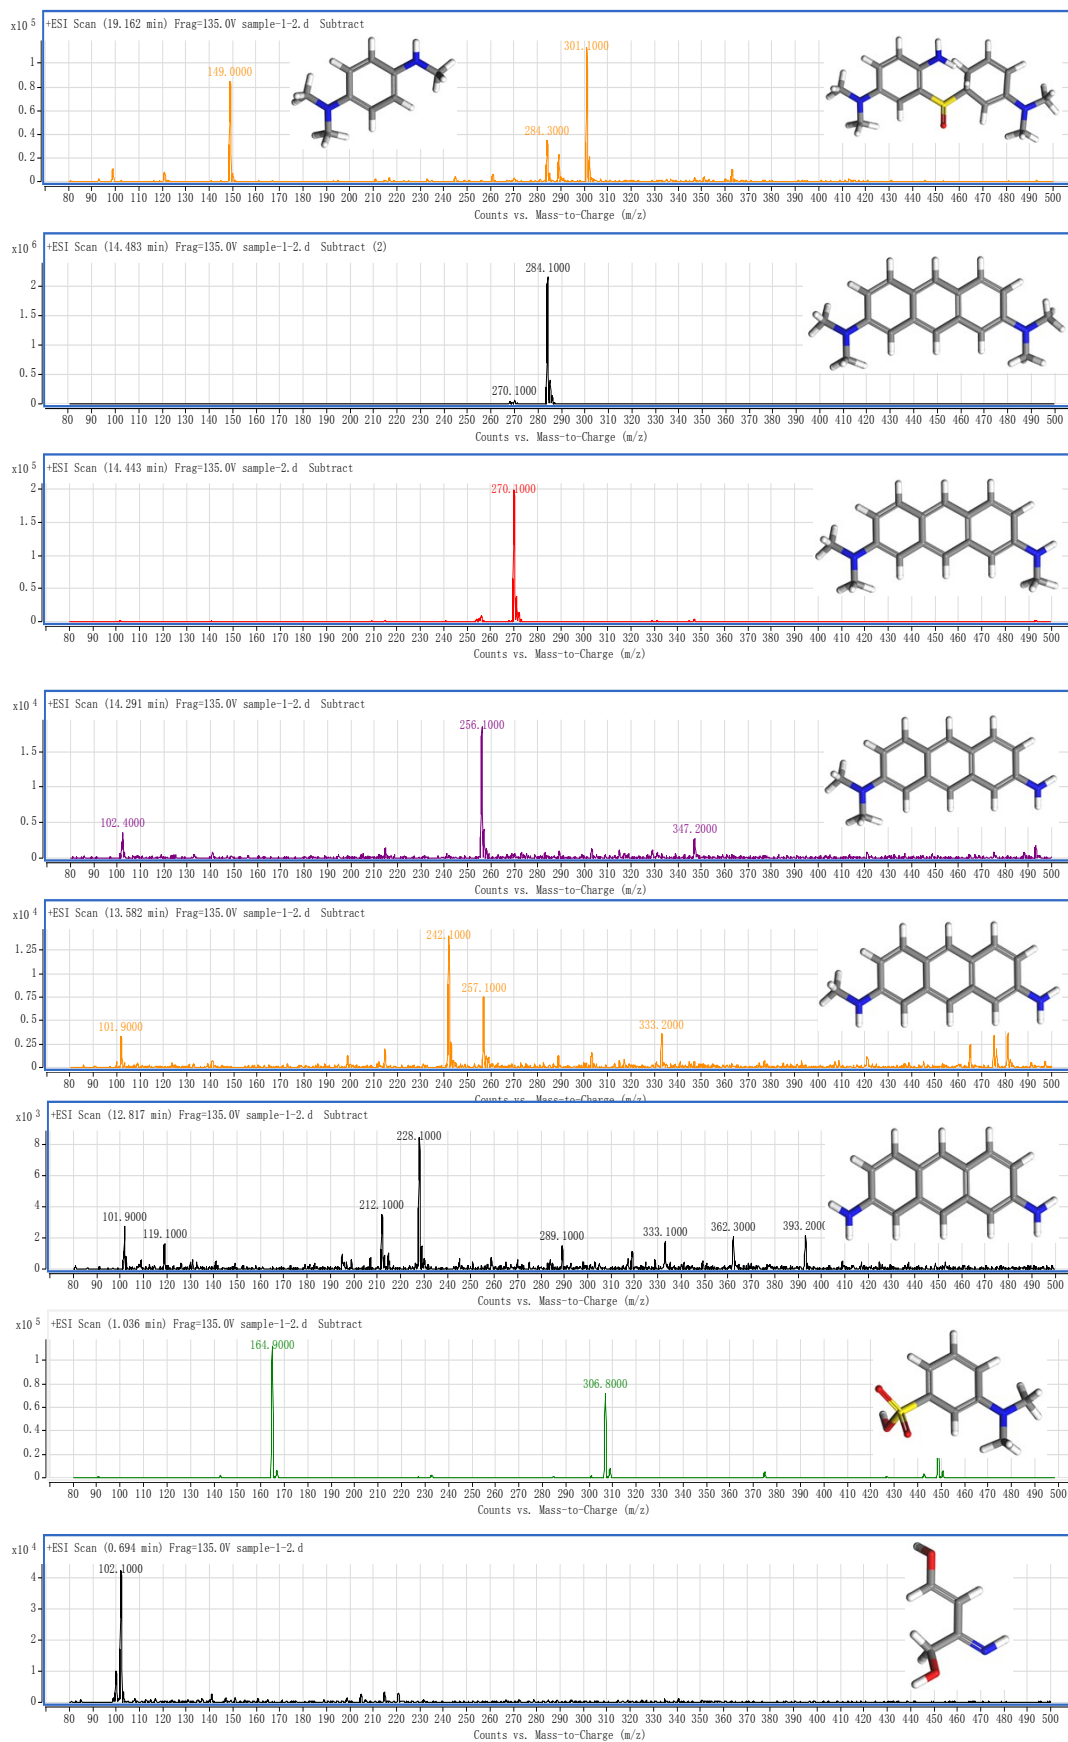

Fig. S12 MS-MS graphs in the positive ion mode for monitoring the degradation of the MB solutions.
